# Supplementary material for: Prevalence and Antimicrobial Resistance of Bacterial Foodborne Pathogens Isolated from Raw Bivalve Molluscs Subjected to Consumption in Poland during a Ten-Year Period
Source: MDPI journal article supplement (doi:10.3390/foods11213521), 2022-11-04
Supplement: s1 [file s1]

**Table S1.** The prevalence of bacterial pathogens in particular years

| Sampling Year | No. of Tested Samples | No. (%) of Positive Samples For |                         |                            |                  |
|---------------|-----------------------|---------------------------------|-------------------------|----------------------------|------------------|
|               |                       | <i>Salmonella</i> spp.          | <i>L. monocytogenes</i> | <i>V. parahaemolyticus</i> | <i>S. aureus</i> |
| 2009          | 100                   | 4 (4.0)                         | 0                       | 27 (27.0)                  | 22 (22.0)        |
| 2010          | 100                   | 0                               | 0                       | 11 (11.0)                  | 16 (16.0)        |
| 2011          | 100                   | 0                               | 4 (4.0)                 | 17 (17.0)                  | 9 (9.0)          |
| 2012          | 100                   | 2 (2.0)                         | 0                       | 16 (16.0)                  | 10 (10.0)        |
| 2013          | 100                   | 8 (8.0)                         | 2 (2.0)                 | 20 (20.0)                  | 15 (15.0)        |
| 2014          | 100                   | 11 (11.0)                       | 6 (6.0)                 | 26 (26.0)                  | 20 (20.0)        |
| 2015          | 100                   | 1 (1.0)                         | 0                       | 37 (37.0)                  | 19 (19.0)        |
| 2016          | 100                   | 1 (1.0)                         | 2 (2.0)                 | 32 (32.0)                  | 11 (11.0)        |
| 2017          | 100                   | 4 (4.0)                         | 2 (2.0)                 | 36 (36.0)                  | 24 (24.0)        |
| 2018          | 100                   | 0                               | 2 (2.0)                 | 20 (20.0)                  | 6 (6.0)          |
| Total (%)     | 1,000 (100)           | 31 (3.1)                        | 18 (1.8)                | 242 (24.2)                 | 152 (15.2)       |
